# Supplementary material for: Small RNA Sequencing and Multiplex RT-PCR for Diagnostics of Grapevine Viruses and Virus-like Organisms
Source: Viruses. 2022 Apr 28;14(5):921. doi: 10.3390/v14050921 (PMC9145883; doi:10.3390/v14050921)
Supplement: Supplementary file 1 [file viruses-14-00921-s001.zip › viruses-1688529-supplementary.pdf]

Supplementary Material

# Small RNA Sequencing and Multiplex RT-PCR for Diagnostics of Grapevine Viruses and Virus-Like Organisms

**Table S1.** Number of reference viral sequences identified by BLASTN search (VirusDetect pipeline).

| Library label | GLRaV-1 | GLRaV-2 | GLRaV-3 | GRSPa V | GFLV | GFkV | GRVfV | GPGV | GV-Sat | satGFLV | HSVd | GYSVd-1 |
|---------------|---------|---------|---------|---------|------|------|-------|------|--------|---------|------|---------|
| L1            | 3       | 1       | /       | 23      | /    | /    | 31    | 1    | 1      | /       | 1    | 1       |
| L2            | /       | /       | 1       | 21      | 81   | /    | 19    | 1    | /      | 4       | 1    | /       |
| L3            | /       | /       | 1       | 36      | /    | 11   | 46    | 2    | /      | /       | 1    | 1       |
| L4            | /       | /       | 1       | 46      | 103  | 3    | 42    | 2    | /      | 4       | 1    | 1       |

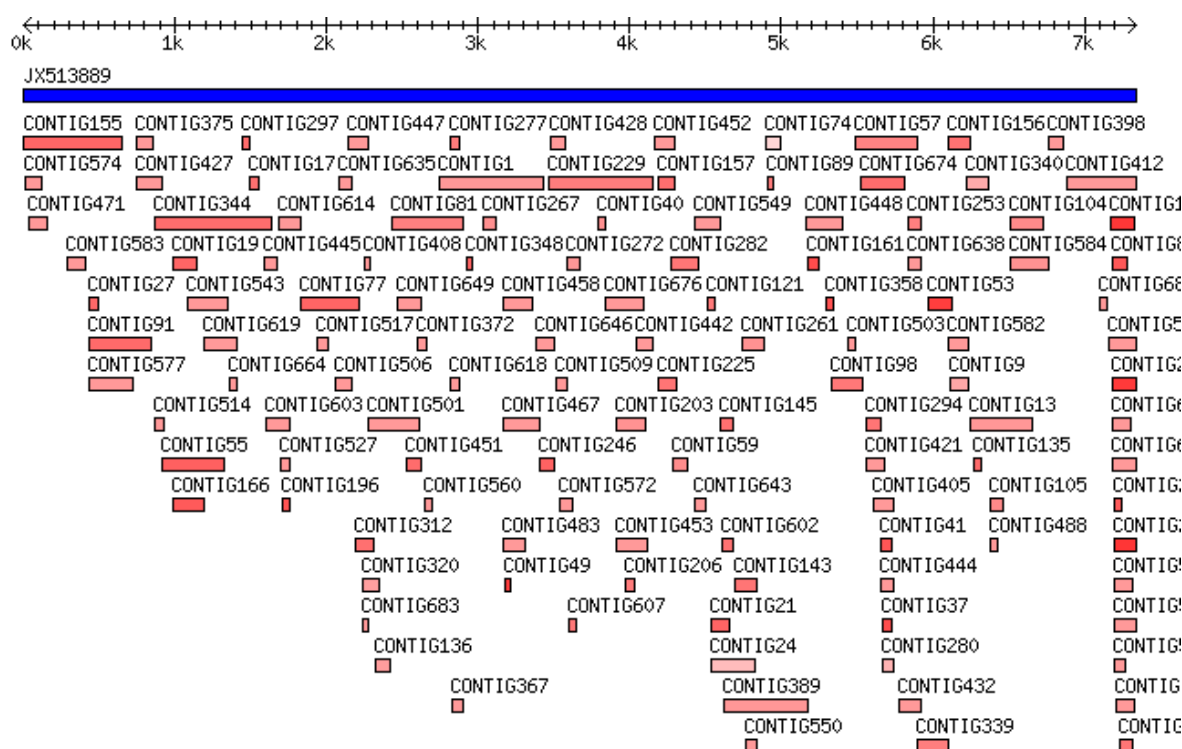

**Figure S1.** GFLV (RNA1) assembled contigs (red bars) mapped to reference sequence (JX513889) (blue bars). Reference was covered with 127 contigs.

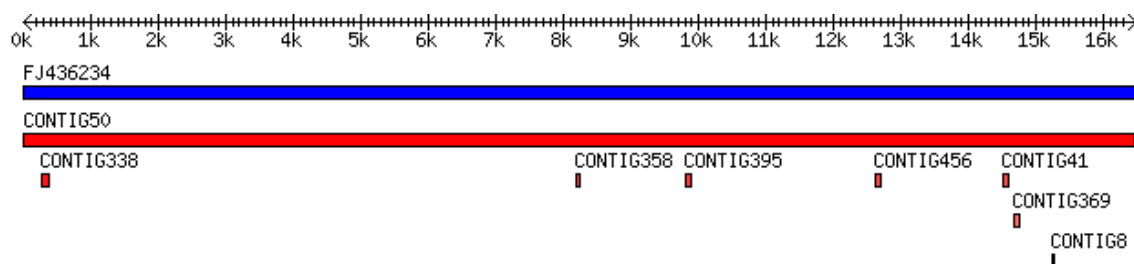

**Figure S2.** GLRaV-2 assembled contigs (red bars) mapped to reference sequence (FJ436234) (blue bars). Reference was covered with 8 contigs, but just one was enough to cover 99.86% of reference genome.
